# Supplementary material for: Clinical Characteristics and Relevance of Oral Candida Biofilm in Tongue Smears
Source: J Fungi (Basel). 2021 Jan 22;7(2):77. doi: 10.3390/jof7020077 (PMC7912297; doi:10.3390/jof7020077)
Supplement: Supplementary file 1 [file jof-07-00077-s001.zip › Supplementary data_sub_rev.pdf]

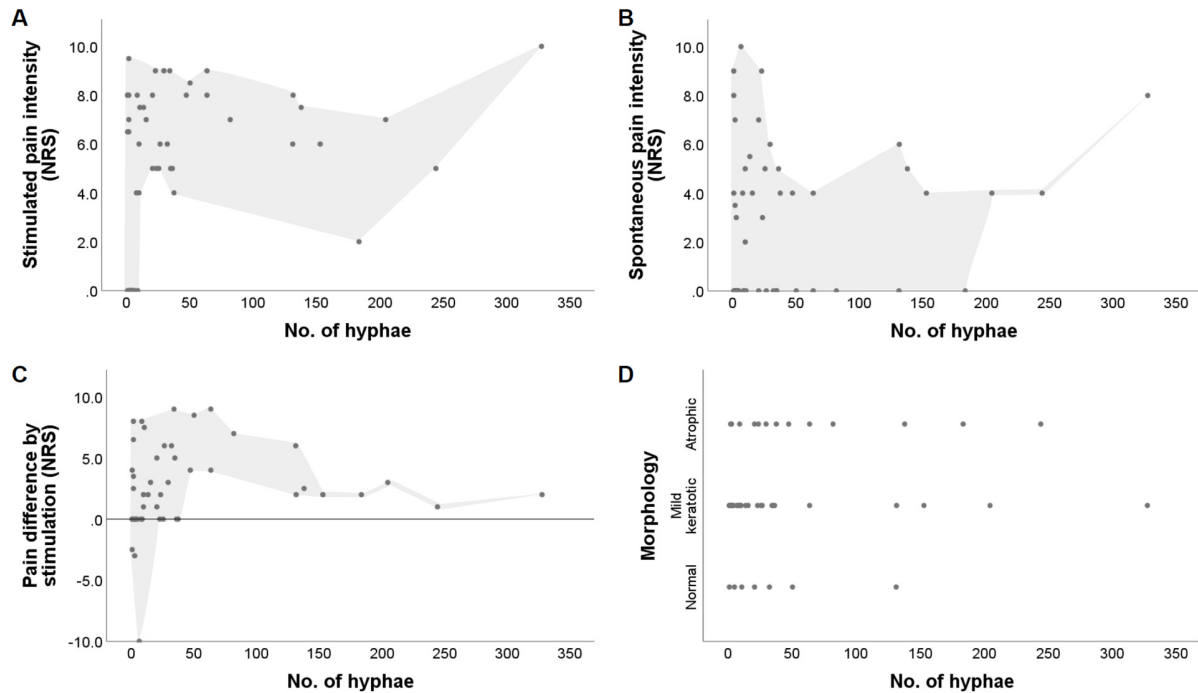

**Fig. S1.** Preliminary data of clinical characteristic distribution by total hyphae value<sup>a, b</sup>

- A. Stimulated pain intensity (NRS): Distributed between NRS4 to 10 in cases with hyphae value over the cut-off point
- B. Spontaneous pain intensity (NRS): No specific patterns by hyphae value
- C. Pain difference by stimulation (NRS)<sup>c</sup>: Distributed at a positive difference value in cases with hyphae value over the cut-off point
- D. Tongue morphologic variants; atrophic and normal variant: No specific patterns by hyphae value

<sup>a</sup>Preliminary data: year 2014-2015, 48 hyphae cases

<sup>b</sup>The gray colored areas present the distribution range of clinical characteristic values.

<sup>c</sup>Pain difference by stimulation was defined as ‘stimulated pain intensity-spontaneous pain intensity (NRS)’.

| Hyphae value<br>cut-off point <sup>b</sup> | Presence of stimulated pain |             |          | Pain aggravated by stimulation |             |          |
|--------------------------------------------|-----------------------------|-------------|----------|--------------------------------|-------------|----------|
|                                            | Sensitivity                 | Specificity | Accuracy | Sensitivity                    | Specificity | Accuracy |
| <b>6</b>                                   | .821                        | .777        | .813     | .844                           | .563        | .750     |
| <b>8</b>                                   | .821                        | .889        | .833     | .844                           | .625        | .771     |
| <b>9</b>                                   | .769                        | .889        | .792     | .813                           | .688        | .771     |
| <b>10</b>                                  | .769                        | 1           | .813     | .813                           | .750        | .792     |
| <b>13</b>                                  | .692                        | 1           | .750     | .719                           | .750        | .729     |
| <b>15</b>                                  | .667                        | 1           | .729     | .688                           | .750        | .708     |
| <b>20</b>                                  | .641                        | 1           | .708     | .656                           | .750        | .688     |
| <b>50</b>                                  | .692                        | 0           | .563     | .375                           | 1           | .583     |

**Table S1.** Sensitivity, specificity and accuracy of hyphae value candidates on preliminary data<sup>a</sup>

<sup>a</sup>Preliminary data : year 2014-2015, 48 hyphae cases

<sup>b</sup>Hyphae grade criteria :

Low-grade : cut-off point > hyphae value, high-grade : cut-off point  $\leq$  hyphae value
